# Supplementary material for: Synthesis of bimetallic–organic framework Cu/Co-BTC and the improved performance of thiophene adsorption
Source: Royal Society of Chemistry journal article supplement (doi:10.1039/c9ra02372k), 2019-01-01
Supplement: c9ra02372k1.pdf [file c9ra02372k1.pdf]

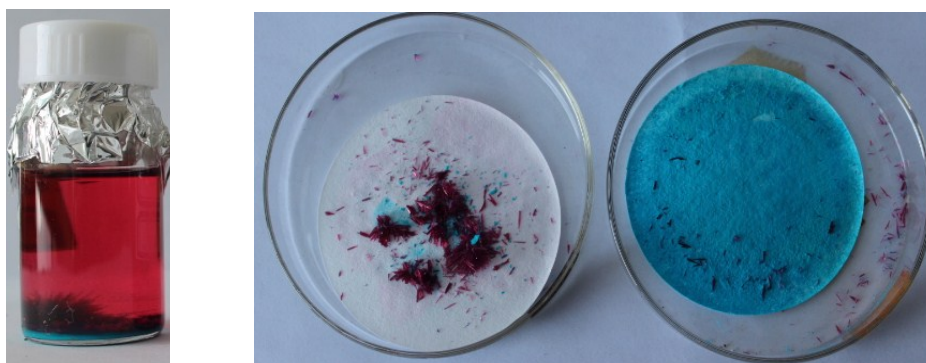

Fig. S1 Photograph of the synthesized sample with  $n(\text{Cu}:\text{Co})=1:9$  in the precursor solution

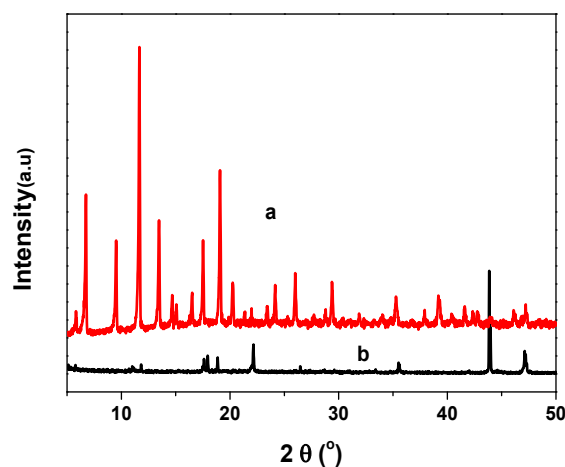

Fig. S2 XRD patterns of blue powder (a) and purple needle crystal (b) in Cu/Co-BTC

Table S1 The Cu/Co ratios of Cu/Co-BTC samples measured by ICP-AES

|   | Feeding Ratio<br>( $n_{\text{Cu}}: n_{\text{Co}}$ ) | $\text{Cu}^{2+}$ wt% | $\text{Co}^{2+}$ wt% | $n_{\text{Cu}}: n_{\text{Co}}$ in MOF |
|---|-----------------------------------------------------|----------------------|----------------------|---------------------------------------|
| 1 | 10:90                                               | /                    | /                    | /                                     |
| 2 | 20:80                                               | 17.85                | 0.54                 | 30                                    |
| 3 | 30:70                                               | 17.91                | 0.37                 | 44                                    |
| 4 | 40:60                                               | 19.44                | 0.43                 | 41                                    |
| 5 | 50:50                                               | 20.04                | 0.28                 | 65                                    |
| 6 | 70:30                                               | 20.70                | 0.11                 | 174                                   |
| 7 | 80:20                                               | 21.55                | 0.036                | 553                                   |
| 8 | 90:10                                               | 15.97                | 0.0097               | 1527                                  |
